# Supplementary material for: Peptide hydrogen-bonded organic frameworks
Source: Royal Society of Chemistry journal article supplement (doi:10.1039/d3cs00648d), 2024-01-01
Supplement: d3cs00648d1.pdf [file d3cs00648d1.pdf]

## Peptide Hydrogen-bonded Organic Frameworks

Thangavel Vijayakanth,<sup>\*a</sup> Sneha Dasgupta,<sup>b</sup> Pragati Ganatra,<sup>c</sup> Sigal Rencus-Lazar,<sup>a</sup> Aamod V. Desai,<sup>d</sup> Shyamapada Nandi,<sup>e</sup> Rahul Jain,<sup>b</sup> Santu Bera,<sup>f</sup> Andy I. Nguyen,<sup>\*c</sup> Ehud Gazit,<sup>\*a,g</sup> Rajkumar Misra<sup>\*b</sup>

---

<sup>a</sup> Shmunis School of Biomedicine and Cancer Research, George S. Wise Faculty of Life Sciences, Tel Aviv University, Tel Aviv-6997801, Israel.

<sup>b</sup> Department of Medicinal Chemistry, National Institute of Pharmaceutical Education and Research (NIPER), Mohali, S.A.S. Nagar (Mohali) 160062, India.

<sup>c</sup> Department of Chemistry, University of Illinois Chicago, Chicago, Illinois 60607, United States.

<sup>d</sup> School of Chemistry, University of St Andrews, North Haugh, St Andrews KY16 9ST, United Kingdom.

<sup>e</sup> Chemistry Division, School of Advanced Sciences, Vellore Institute of Technology, 600127, Chennai, India.

<sup>f</sup> Department of Chemistry, Ashoka University, Sonapat, Haryana 131029, India.

<sup>g</sup> Sagol School of Neuroscience, Tel Aviv University, 6997801 Tel Aviv, Israel.

\*Corresponding authors' email: [vijayakanth@mail.tau.ac.il](mailto:vijayakanth@mail.tau.ac.il); [andyn@uic.edu](mailto:andyn@uic.edu); [ehudg@post.tau.ac.il](mailto:ehudg@post.tau.ac.il); [rkmisra@niper.ac.in](mailto:rkmisra@niper.ac.in)

---

**Table S1.** Summary of properties and functionality in peptide-based hydrogen-bonded porous frameworks (P-HPFs)

| P-HPFs name | No of hydrophobic residues | No of hydrophilic residues | Percentage of hydrophobic |
|-------------|----------------------------|----------------------------|---------------------------|
| VA          | 2                          | 0                          | 100                       |
| AV          | 2                          | 0                          | 100                       |
| AI          | 2                          | 0                          | 100                       |
| IA          | 2                          | 0                          | 10                        |
| VV          | 2                          | 0                          | 100                       |
| VI          | 2                          | 0                          | 100                       |
| IV          | 2                          | 0                          | 100                       |
| LS          | 1                          | 1                          | 50                        |
| FF          | 2                          | 0                          | 100                       |
| FG          | 2                          | 0                          | 100                       |
| FL          | 2                          | 0                          | 100                       |
| FW          | 2                          | 0                          | 100                       |
| LL          | 2                          | 0                          | 100                       |
| LF          | 2                          | 0                          | 100                       |
| IL          | 2                          | 0                          | 100                       |
| WG          | 2                          | 0                          | 100                       |
| Abu-Abu     | 2                          | 0                          | 100                       |
| Abu-Nva     | 2                          | 0                          | 100                       |
| Abu-Val     | 2                          | 0                          | 100                       |
| Abu-Leu     | 2                          | 0                          | 100                       |
| Abu-Ile     | 2                          | 0                          | 100                       |
| Nva-Abu     | 2                          | 0                          | 100                       |

|                       |    |    |       |
|-----------------------|----|----|-------|
| Nva-Nva               | 2  | 0  | 100   |
| Nva-Val               | 2  | 0  | 100   |
| Nva-Leu               | 2  | 0  | 100   |
| Nva-Ile               | 2  | 0  | 100   |
| HYF                   | 2  | 0  | 100   |
| DYF                   | 2  | 1  | 75    |
| YFD                   | 2  | 1  | 75    |
| F- <sup>D</sup> Nva-F | 3  | 0  | 100   |
| SP1                   | 8  | 1  | 88.89 |
| SP2                   | 4  | 0  | 100   |
| SP3                   | 14 | 13 | 51.85 |
| SP4                   | 12 | 14 | 46.15 |
| SP5                   | 14 | 12 | 53.85 |
| SP6                   | 13 | 13 | 50    |
| SP7                   | 11 | 15 | 42.31 |
| SP8                   | 10 | 6  | 62.5  |
| F1                    | 7  | 4  | 63.63 |
| F2                    | 5  | 5  | 50    |
| F3                    | 8  | 4  | 66.67 |
| F4                    | 15 | 0  | 100   |

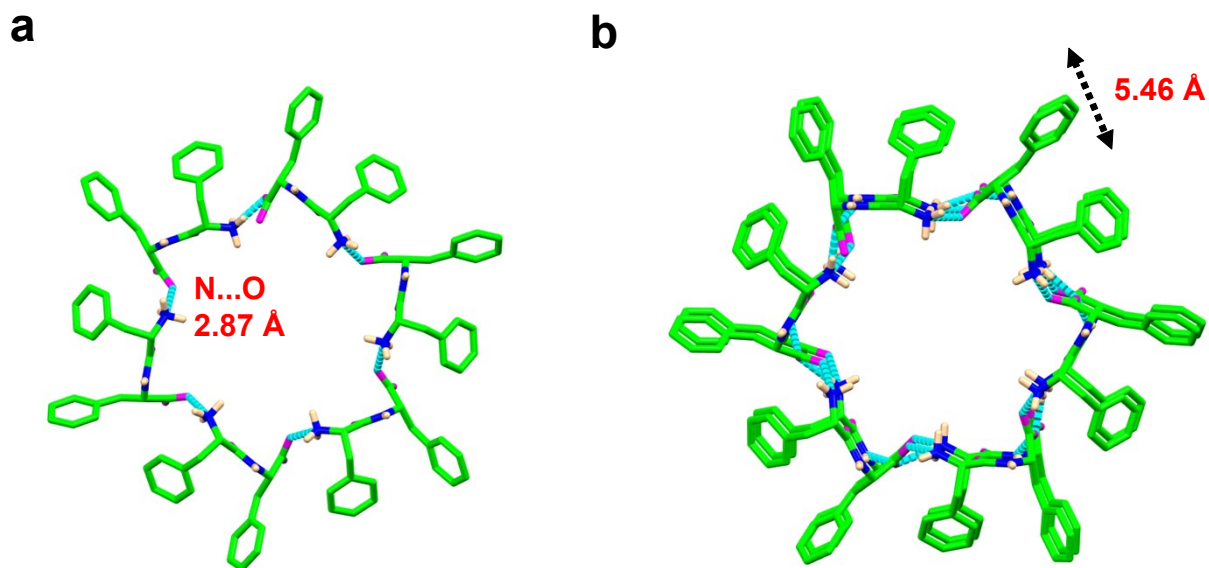

**Figure S1.** Unit-cell packing diagram of FF showing the formation of molecular rings by six FF molecules and its donor-acceptor interactions (a) and its pi-pi stacking modes (b). The hydrophilic channels formed by six FF molecules are shown and the solvent water molecules are removed for structural clarity.

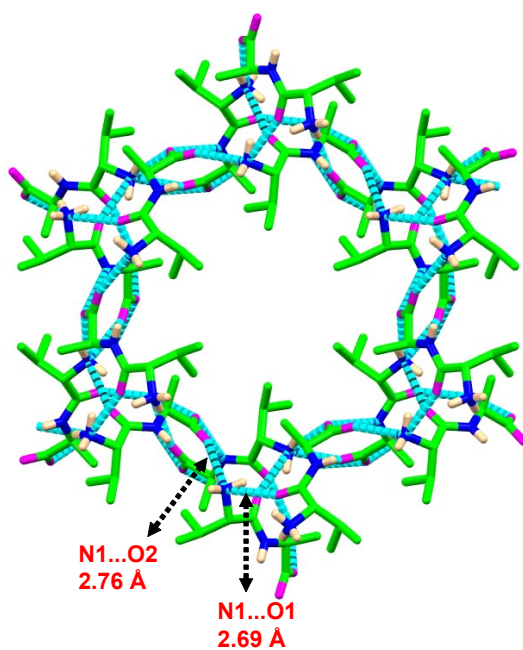

**Figure S2.** Unit-cell packing diagram of AV displaying a porous framework mediated via head-to-tail hydrogen-bonded interactions between ammonium (NH<sub>3</sub><sup>+</sup>) and carboxylate (COO<sup>-</sup>) residues.

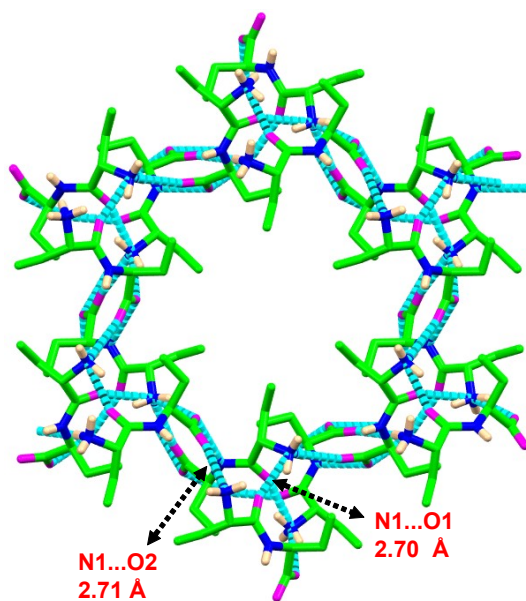

**Figure S3.** Unit-cell packing diagram of Abu-Abu displaying a porous framework mediated via head-to-tail hydrogen-bonded interactions between ammonium ( $\text{NH}_3^+$ ) and carboxylate ( $\text{COO}^-$ ) residues.

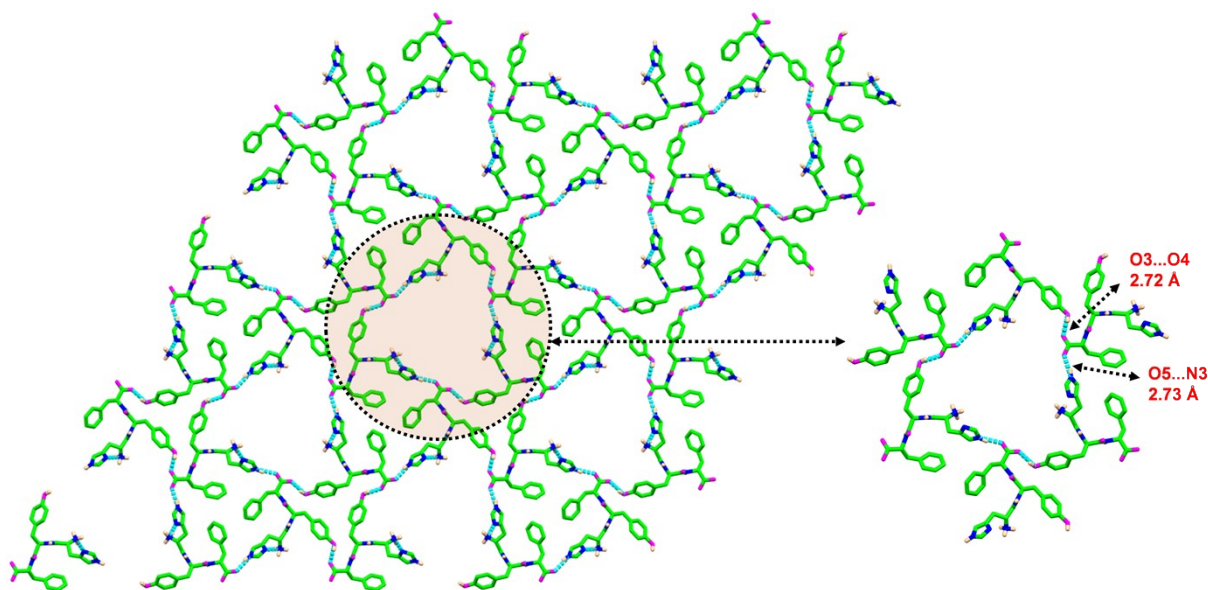

**Figure S4.** Higher-order crystal packing structure of HYF displaying hydrogen-bonded porous assemblies. The highlighted part shows the hydrogen-bonded porous framework channels formed by six HYF molecules and the solvent water molecules are removed for structural clarity.

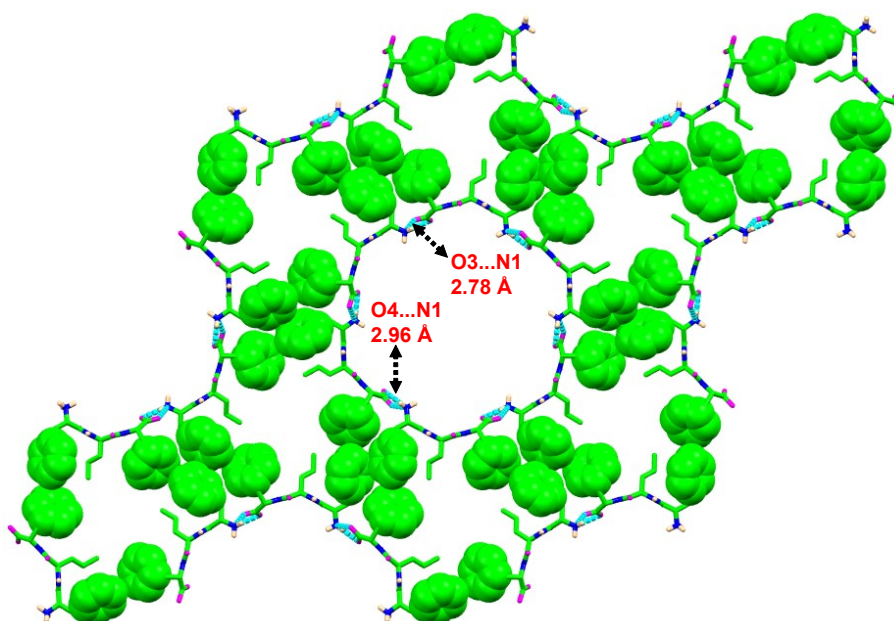

**Figure S5.** Higher-order crystal structure of F-PNva-F displaying a porous framework mediated via head-to-tail hydrogen-bonded interactions between ammonium ( $\text{NH}_3^+$ ) and carboxylate ( $\text{COO}^-$ ) residues. The aromatic phenyl rings are highlighted in the space-filling model.

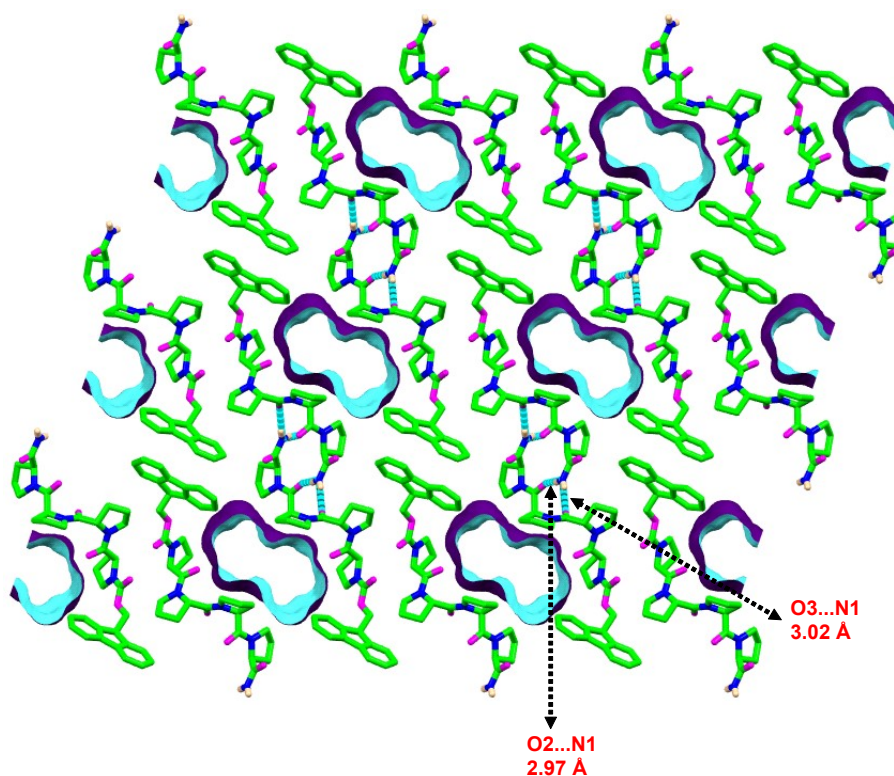

**Figure S6.** Higher-order crystal packing diagram of PP4 displaying hydrogen-bonded porous framework and the solvent-accessible channels (viewed along the b-axis). The solvent ethanol molecules are removed for structural clarity.

a.  $\pi$ - $\pi$  stacking

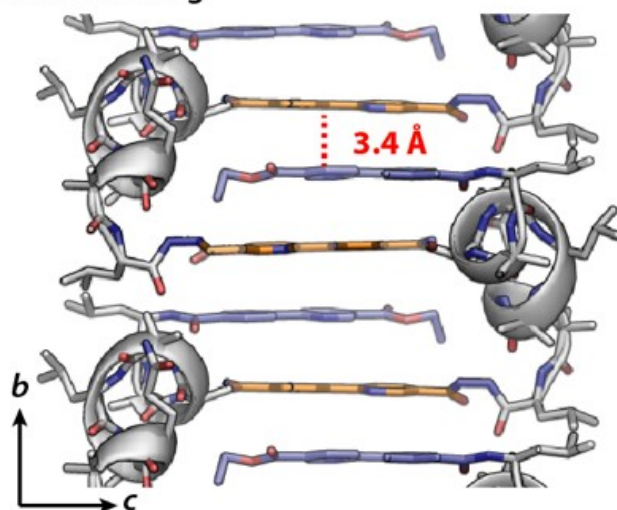

b. Inter-chain hydrogen-bonds

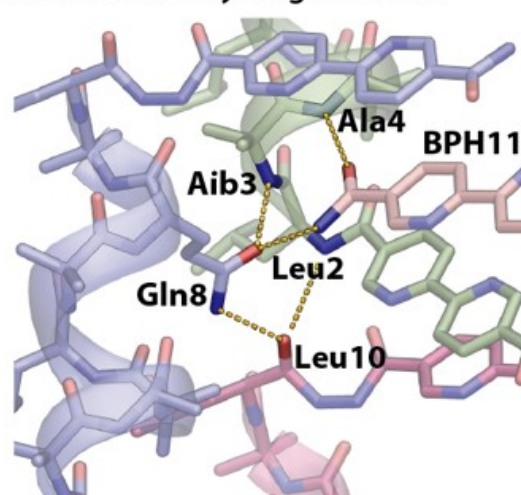

**Figure S7.** Views of the  $\pi$ - $\pi$  stacking and inter-chain H-bonding contributing to the structure of UIC-1 (SP1).
